# Supplementary material for: The m6A methylome of SARS-CoV-2 in host cells
Source: PubMed Central journal article supplement (PMC8115241; doi:10.1038/s41422-020-00465-7), 2021-01-28
Supplement: 41422_2020_465_MOESM1_ESM.pdf [file 41422_2020_465_MOESM1_ESM.pdf]

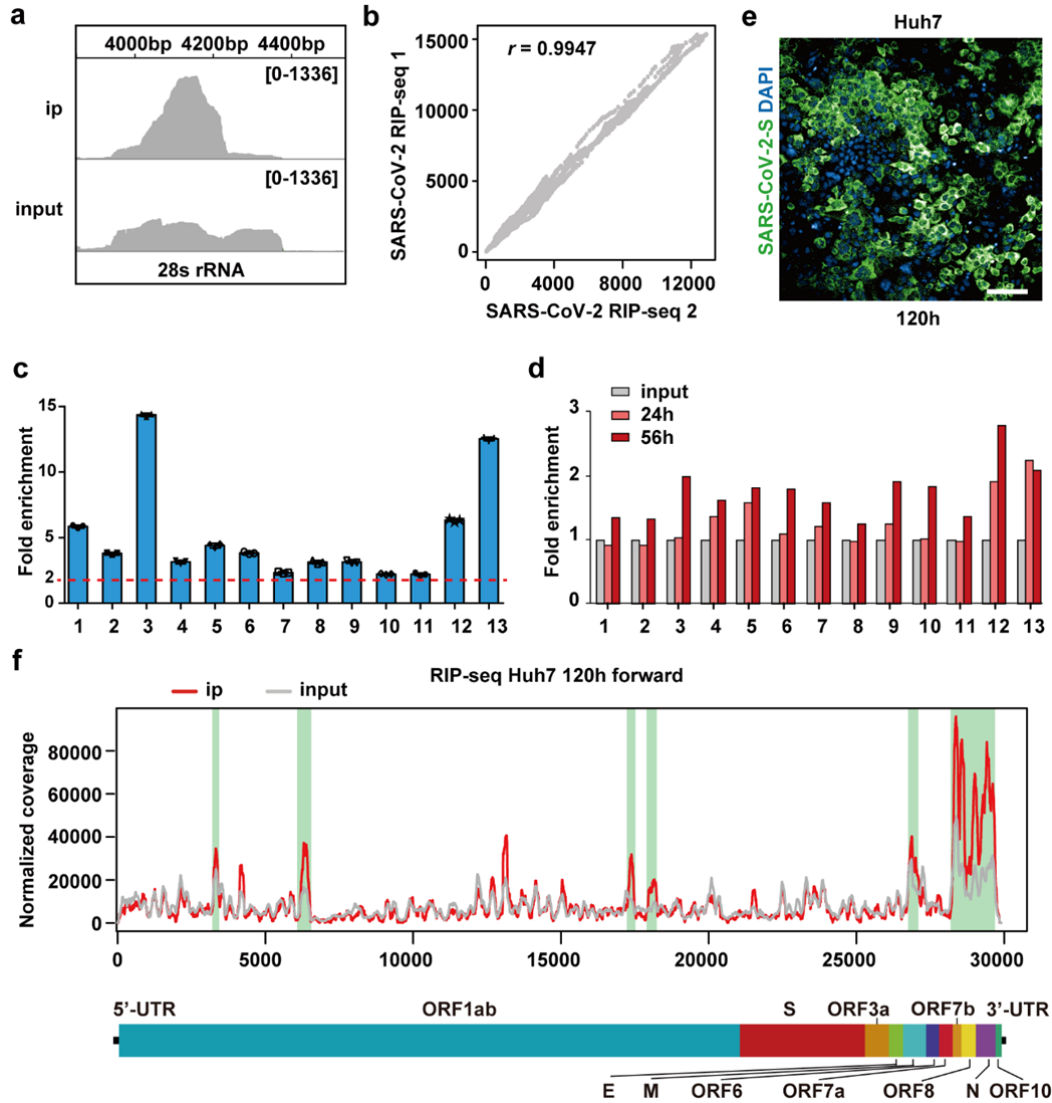

**Fig S1. m<sup>6</sup>A methylome of SARS-CoV-2 genomic RNA.**

(a) IGV showing the RIP-seq reads of known m<sup>6</sup>A residues at 4,190 position of 28S rRNA, suggesting good enrichment of RIP-seq.

(b) Correlation analysis of two biological replicates of SARS-CoV-2 RIP-seq data.

(c) Validation of the m<sup>6</sup>A-marked viral RNA (13 m<sup>6</sup>A peaks identified by RIP-seq) by performing m<sup>6</sup>A-IP-qPCR using a different m<sup>6</sup>A antibody (as an orthogonal evidence to the originally used Millipore m<sup>6</sup>A antibody in RIP-seq) in Vero cells at 56 h post infection.

Data are represented as mean  $\pm$  SD; N = 3.

(d) m<sup>6</sup>A peak intensity of SARS-CoV-2-infected Vero cells between 24h and 56h post infection. “peak intensity” is calculated as  $RPKM_{IP}/RPKM_{Input}$  in each peak.

(e) Immunofluorescence of SARS-CoV-2-infected Huh7 cells (S protein, green) and nuclei (DAPI, blue) at 120h after infection.

(f) Refined RIP-seq of SARS-CoV-2 RNA harvested from Huh7 cells at 120 hpi showing the distribution of m<sup>6</sup>A reads mapped to SARS-CoV-2 genome (red line). The baseline signal of input samples is represented by grey line and m<sup>6</sup>A peaks are represented by green rectangles along the x axis. A schematic diagram of the SARS-CoV-2 genome is shown below to indicate the location of the m<sup>6</sup>A-enriched sequences. Data are representative of N = 2 determinations.
