# Supplementary material for: The m6A methylome of SARS-CoV-2 in host cells
Source: PubMed Central journal article supplement (PMC8115241; doi:10.1038/s41422-020-00465-7), 2021-01-28
Supplement: 41422_2020_465_MOESM2_ESM.pdf [file 41422_2020_465_MOESM2_ESM.pdf]

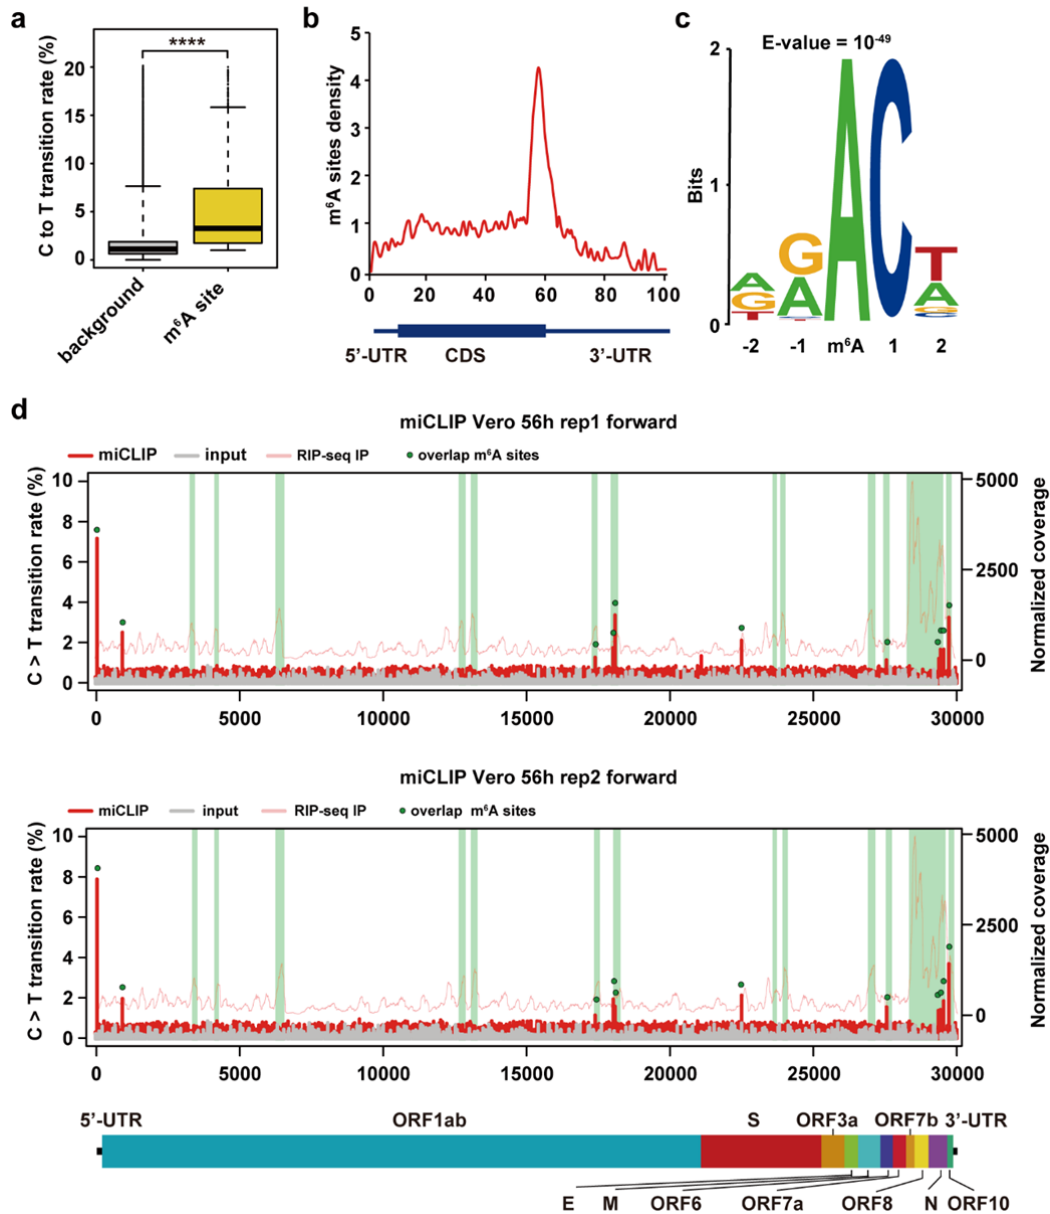

**Fig S2. m<sup>6</sup>A sites identified by miCLIP in Vero and SARS-CoV-2 genomic RNA.**

(a) Boxplot showing the C to T transition rate of identified m<sup>6</sup>A sites and background in host Vero cells. Statistical significance of the difference was determined by unpaired two-sided Mann-Whitney U-test. \*\*\*\* $P < 0.0001$ .

(b) miCLIP-identified m<sup>6</sup>A sites showed a metagenome distribution profile typical for m<sup>6</sup>A, suggesting good performance of miCLIP.

(c) Motif analysis revealed a “DRACH” consensus for m<sup>6</sup>A sites identified by miCLIP in host Vero cells (E-value =  $7.7 \times 10^{-49}$ ).

(d) m<sup>6</sup>A sites at single-base resolution identified by miCLIP across SARS-CoV-2 genome.

The grey line and red line showing the ratio of C to T transitions of input samples and immunoprecipitation samples, respectively. The green dots denote m<sup>6</sup>A sites that located within the identified m<sup>6</sup>A peaks (denoted by green rectangles) and are identified in both two biological replicates of miCLIP, while the grey dots showing the m<sup>6</sup>A site identified only in miCLIP but not in the m<sup>6</sup>A peaks identified by RIP-seq. The location of the m<sup>6</sup>A-enriched sequences is shown by a schematic diagram of the SARS-CoV-2 genome.
