# Supplementary material for: The m6A methylome of SARS-CoV-2 in host cells
Source: PubMed Central journal article supplement (PMC8115241; doi:10.1038/s41422-020-00465-7), 2021-01-28
Supplement: 41422_2020_465_MOESM6_ESM.pdf [file 41422_2020_465_MOESM6_ESM.pdf]

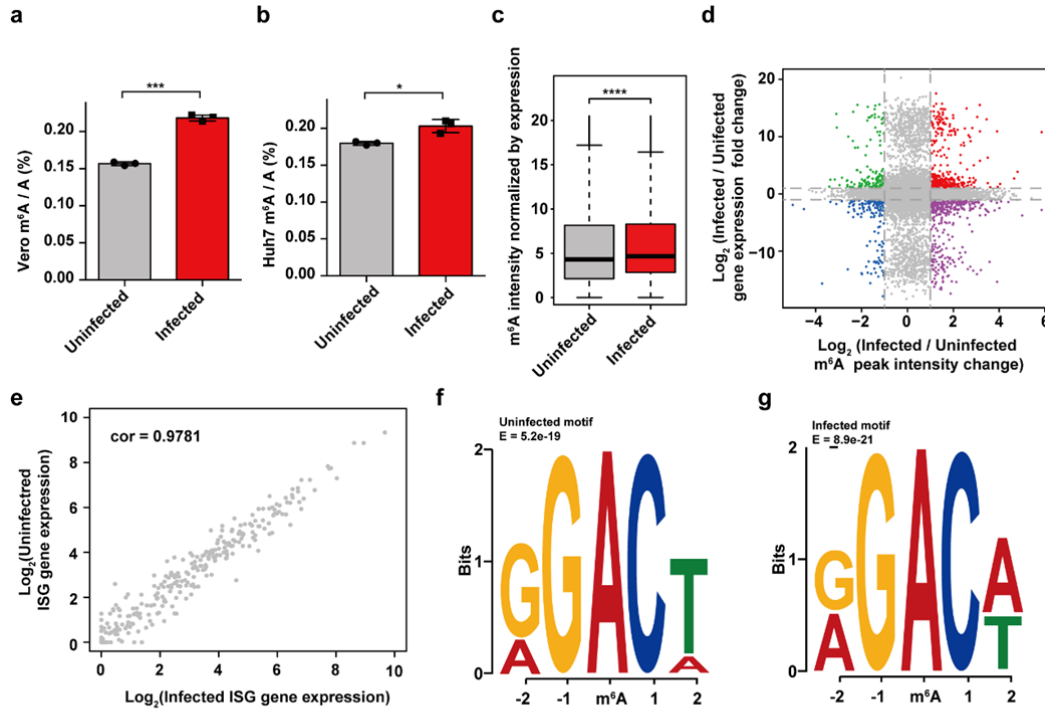

**Fig S6. The influences of SARS-CoV-2 infection on m<sup>6</sup>A methylome of Huh7 cell transcripts.**

(a and b) m<sup>6</sup>A abundance quantification in uninfected and SARS-CoV-2-infected Vero (a) and Huh7 cells (b) by the liquid chromatography-tandem mass spectrometry (LC-MS/MS).

All data are the mean  $\pm$  SD of the indicated number of replicates (N = 3). Statistical significance of the difference was determined by unpaired Student's t-test. \*\*\* $P < 0.001$ ; \* $P < 0.05$ .

(c) m<sup>6</sup>A intensity analysis in uninfected and SARS-CoV-2-infected Huh7 cells. Statistical significance of the difference was determined by unpaired two-sided Mann-Whitney U-test. \*\*\*\* $P < 0.0001$ .

(d) Correlation between changes in gene expression and m<sup>6</sup>A modification between uninfected and SARS-CoV-2-infected Huh7 cells. Red dots showing transcripts with

increased gene expression level and upregulated m<sup>6</sup>A signals; pink dots showing transcripts with decreased gene expression level and upregulated m<sup>6</sup>A signals; green dots showing transcripts with increased gene expression level and downregulated m<sup>6</sup>A signals; blue dots showing transcripts with decreased gene expression level and downregulated m<sup>6</sup>A signals; grey dots showing transcripts with either unchanged gene expression level or unchanged m<sup>6</sup>A signals.

**(e)** Correlation analysis of expression level of interferon-stimulated genes between uninfected and SARS-CoV-2-infected Huh7 cells.

**(f and g)** Transcriptome-wide motif analysis revealed consensus m<sup>6</sup>A peaks in uninfected **(f)** and SARS-CoV-2-infected Huh7 cells **(g)**, respectively.
